# Supplementary material for: ATP Is Required and Advances Cytokine-Induced Gap Junction Formation in Microglia In Vitro
Source: Hindawi journal article supplement (doi:10.1155/2013/216402), 2013-01-01
Supplement: f1 [file 216402.f1.pdf]

|                                    | Rat microglia |       | EOC20 cells |      |   |
|------------------------------------|---------------|-------|-------------|------|---|
| Treatment                          | I.D.C.        | ±SEM. | I.D.C.      | ±SEM | n |
| Control - 3.5 h                    | 5.5           | 1.6   | 5.1         | 1.4  | 6 |
| ATP - 2 h                          | 12,0          | 2,0   | 9.5         | 2.8  | 6 |
| TNF- $\alpha$ - 3.5 h              | 13.3          | 3.3   | 12.4        | 2.8  | 3 |
| TNF- $\alpha$ /ATP - 3.5 h         | 31.1          | 4.1   | 30.7        | 0.7  | 5 |
| Control - 9 h                      | 5.4           | 2.1   | 5.8         | 4.3  | 4 |
| TNF- $\alpha$ - 9 h                | N.D.          | N.D.  | 9.7         | 0.2  | 4 |
| IFN- $\gamma$ - 9 h                | N.D.          | N.D.  | 17.5        | 4.8  | 4 |
| IL-1 $\beta$ - 9 h                 | N.D           | N.D   | 12.5        | 4.3  | 5 |
| TNF- $\alpha$ /IFN- $\gamma$ - 9 h | 32.1          | 2.1   | 33.3        | 2.1  | 6 |
| TNF- $\alpha$ /IL-1 $\beta$ - 9 h  | N.D.          | N.D.  | 32.5        | 2.5  | 4 |

**Table S1** Incidence of dye coupling (I.D.C., raw data) in rat microglia and EOC20 cells under control conditions and after treatment with 1 mM ATP; 1 ng/ml TNF- $\alpha$ ; 1 ng/ml IFN- $\gamma$ ; 1 ng/ml IL-1 $\beta$  and mixes as shown in the table and described in Methods. I.D.C. was calculated as the percentage of microinjected cells in which dye transference to neighbor cells was observed. N.D.: not determined.

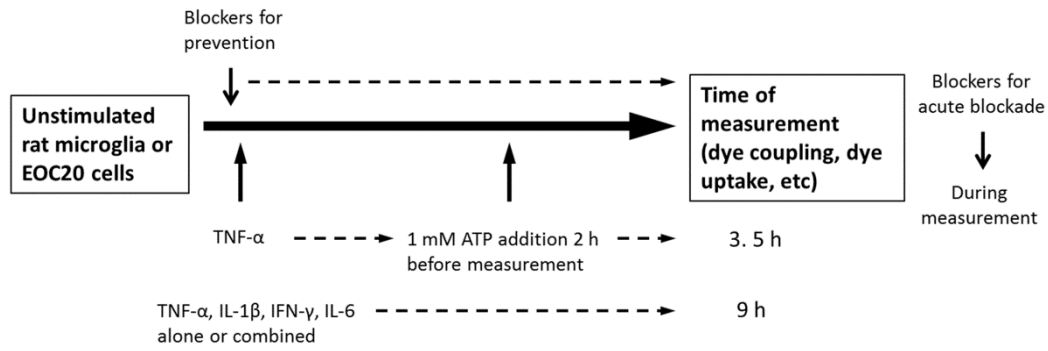

**Figure S1.** *Microglia treatment.* Schematic diagram illustrating the protocol used for microglia treatments with cytokines plus ATP and blockers.

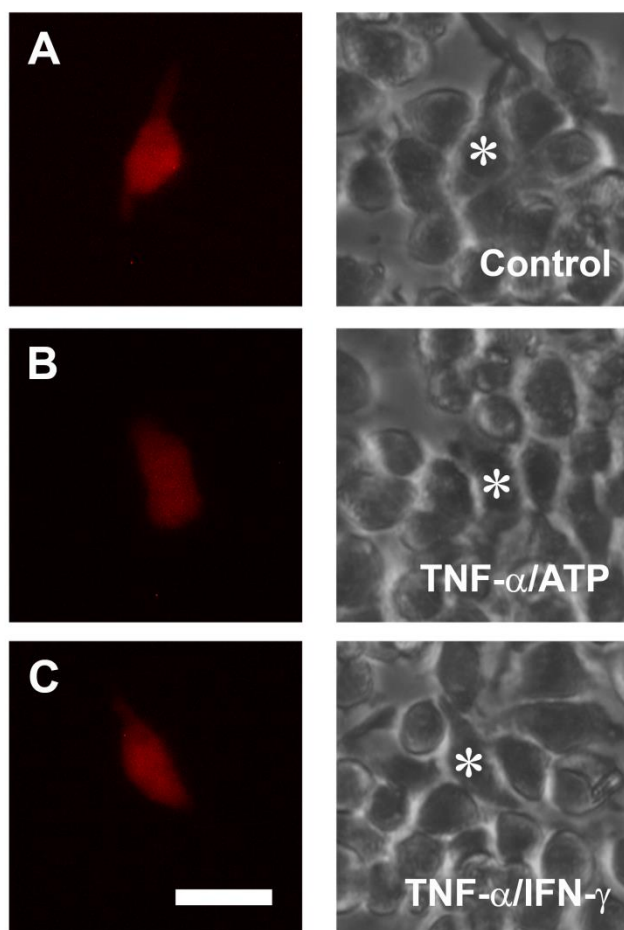

**Figure S2.** *Dye coupling induced by pro-inflammatory agents does not correspond to cytoplasmic bridges.* (A-C) Dye transfer was evaluated 5 min after rhodamine-dextran (RD, MW 10 kDa) microinjection of a single cell (indicated with an asterisk) in EOC20 cultures (A) under control conditions, or after treatment with (B) TNF- $\alpha$  plus ATP (TNF- $\alpha$ /ATP) for 3.5 h or with (C) TNF- $\alpha$ /IFN- $\gamma$  for 9 h. Phase contrast views of each micrograph are shown in right panels. Scale bar: 20  $\mu$ m.

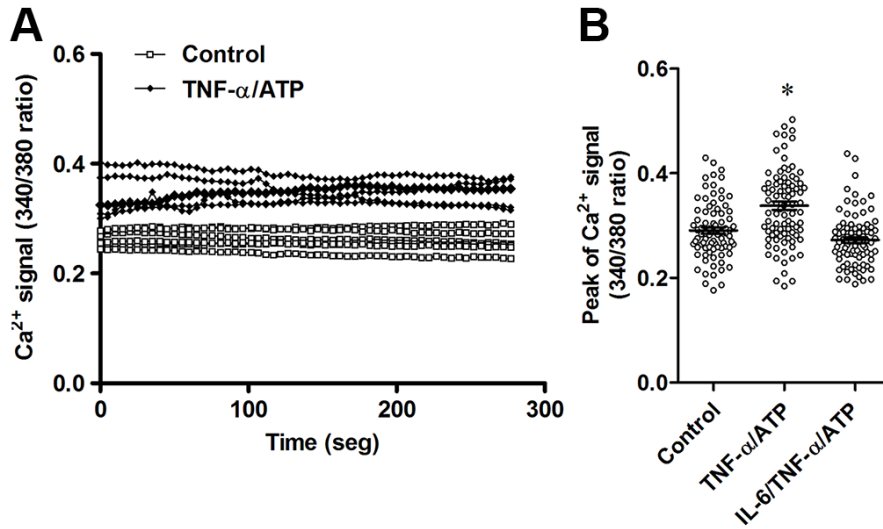

**Figure S3.** *IL-6 prevents the rise in  $[Ca^{2+}]_i$  induced by TNF- $\alpha$  plus ATP.* (A) Graph showing the Ca<sup>2+</sup> signal (340/380 ratio) in EOC20 cells loaded with Fura-2 in a time-lapse experiment under control conditions or treated 3.5 h with TNF- $\alpha$  plus ATP. Each line corresponds to one cell. (B) Graph showing the peak in Ca<sup>2+</sup> signal in EOC20 cells under different conditions. Each dot corresponds to one cell, \*P<0.05 versus control condition. Each line represents the mean  $\pm$  SEM.

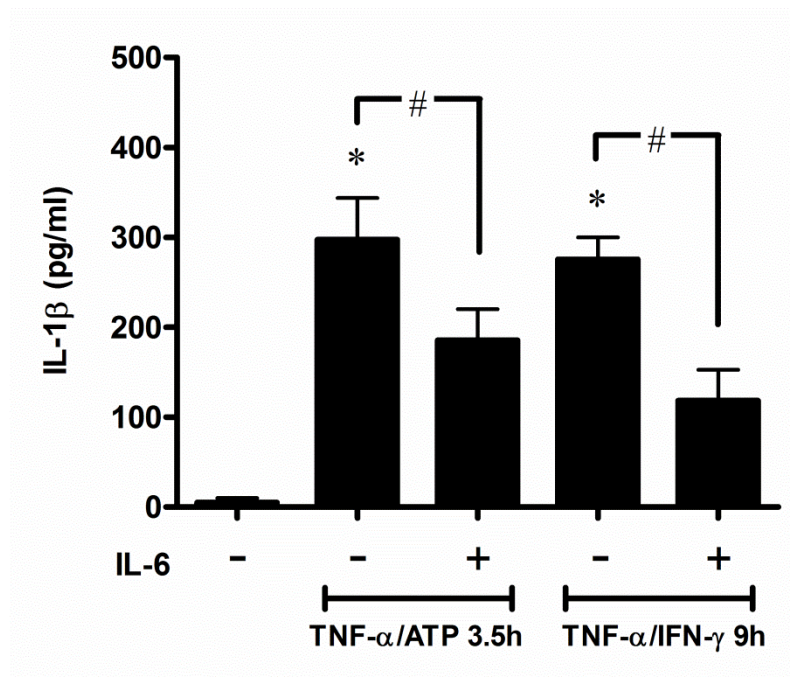

**Figure S4.** *IL-6 reduces pro-inflammatory-induced IL-1 $\beta$  release in EOC20 cells.* Graph showing IL-1 $\beta$  release from TNF- $\alpha$  plus ATP- or TNF- $\alpha$ /IFN- $\gamma$ -treated EOC20 cells at times that induces dye coupling. \* $P < 0.05$  versus control condition, # $P < 0.05$  between indicated treatments. Each bar represents the mean  $\pm$  SEM.

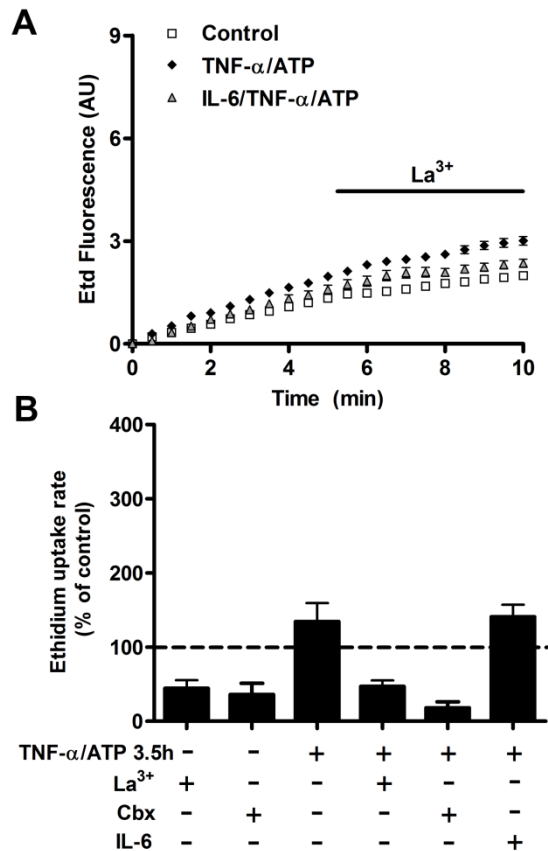

**Figure S5.** *TNF- $\alpha$  plus ATP did not increase membrane permeabilization in EOC20 cells.* (A) Time-lapse measurements of Ethidium (Etd) uptake in EOC20 cells under control conditions (white squares), or after treatment with TNF- $\alpha$  plus ATP (black diamonds) or IL-6/TNF- $\alpha$  plus ATP (gray triangles) for 3.5 h. Each value represents the mean  $\pm$  SEM of 30 cells in each of 5 independent experiments. After 10 min of basal uptake, 200  $\mu$ M La<sup>3+</sup> was applied to the bath. (B) Ethidium (Etd) uptake rate expressed as percentage of Etd control conditions (dashed line) in EOC20 cells treated with TNF- $\alpha$ /ATP for 3.5 h. Is shown the acute effect of 200  $\mu$ M La<sup>3+</sup>, 10  $\mu$ M carbenoxolone (Cbx), or pre-treatment with 10 ng/ml of interleukin-6 (IL-6) in TNF- $\alpha$ /ATP treated EOC20 cells. Each bar represents the mean  $\pm$  SEM, n=5.

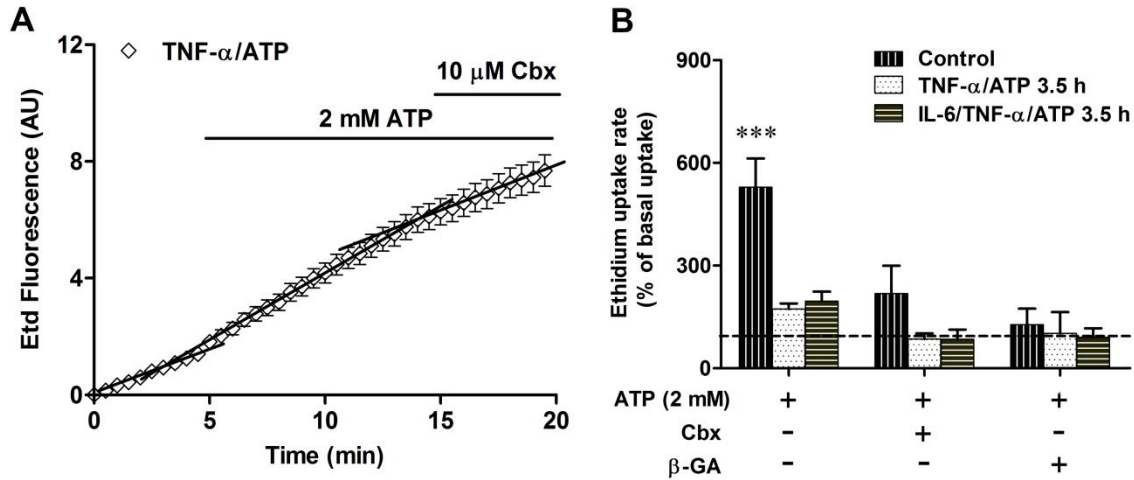

**Figure S6.** Extracellular ATP did not increase the cell membrane permeability in EOC20 cells treated with TNF- $\alpha$  plus ATP. (A) Time-lapse measurement. After 5 min of basal uptake, 2 mM ATP was added to extracellular solution. At 15 min of recording, 10  $\mu$ M of carbenoxolone (Cbx) a HC blocker was added to the bath. Black lines denote the slope at different times of Etd uptake. Data represents the mean  $\pm$  SEM of 30 cells in each of 5 independent experiments. (B) Graph showing the effect of acute application of extracellular ATP in EOC20 cells under control conditions or after treatment with TNF- $\alpha$  plus ATP, or with 10 ng/ml IL-6/TNF- $\alpha$  plus ATP for 3.5 h. The effect of acute blockade with 10  $\mu$ M carbenoxolone (Cbx) or 50  $\mu$ M 18- $\beta$ -glycyrrhetic acid ( $\beta$ -GA) is also shown. Data was normalized to basal uptake in each condition (dashed line) and represents the mean  $\pm$  SEM. \*\*\*P<0.001 versus control condition.

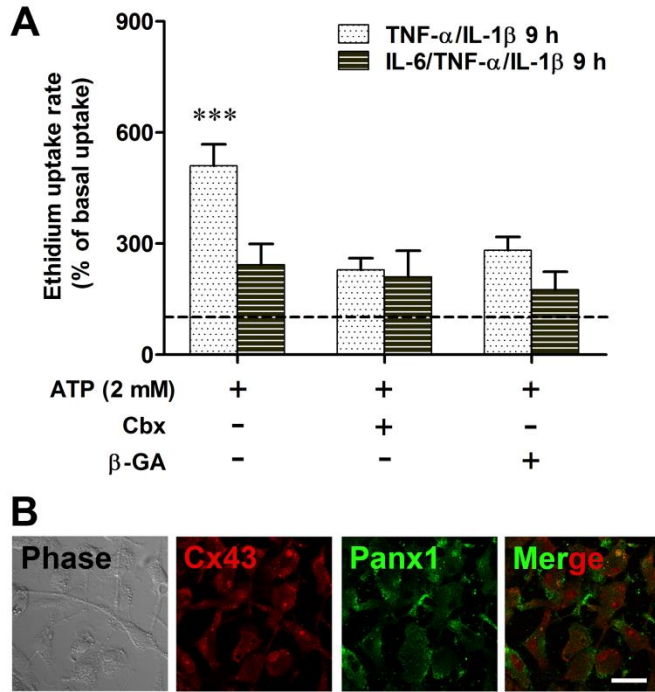

**Figure S7.** *TNF-α/IL-1β* up-regulate *Cx43* and *Panx1* in rat microglia. (A) Phase contrast and confocal images showing immunoreactivity for *Cx43* (red) and *Panx1* (green) in EOC20 cells after treatment with *TNF-α/IL-1β* for 9 h. Scale bar: 20  $\mu$ m. (B) ATP-induced Etd uptake by EOC20 cells treated with *TNF-α/IL-1β* with or without 10 ng/ml IL-6 for 9 h. The effect of 2 mM ATP, 10  $\mu$ M carbenoxolone (Cbx) or 50  $\mu$ M 18- $\beta$ -glycyrrhetinic acid ( $\beta$ -GA, a HC blocker) are also shown. Values were normalized to basal uptake in each condition (dashed line) and are expressed as the mean  $\pm$  SEM, n=5. \*\*\*P<0.001 versus control condition.
